# Supplementary material
Source: Springer Nature journal article supplement (http://www.springermedizin.de/resource/supplementary/12935_2008_225_MOESM4_ESM.pdf/9541354)

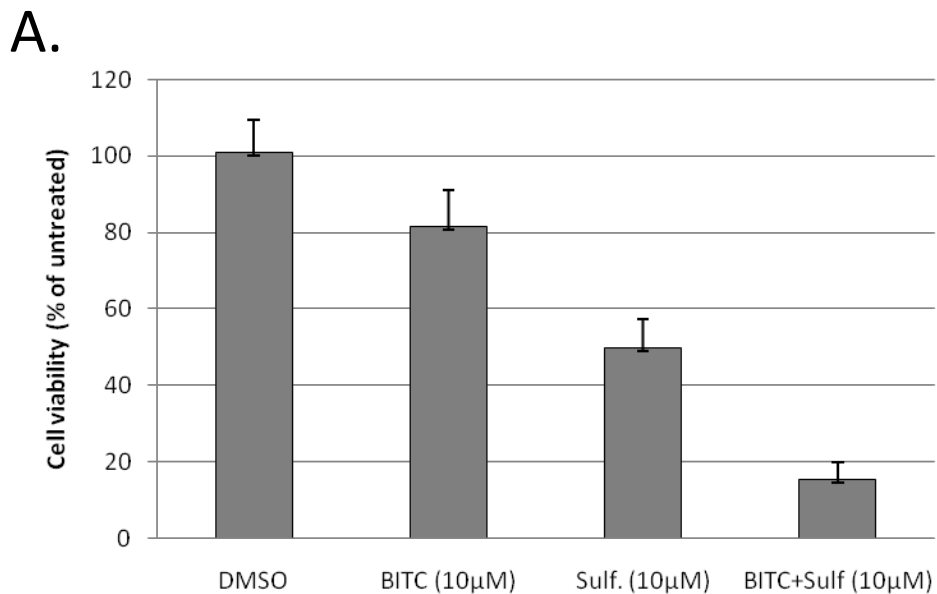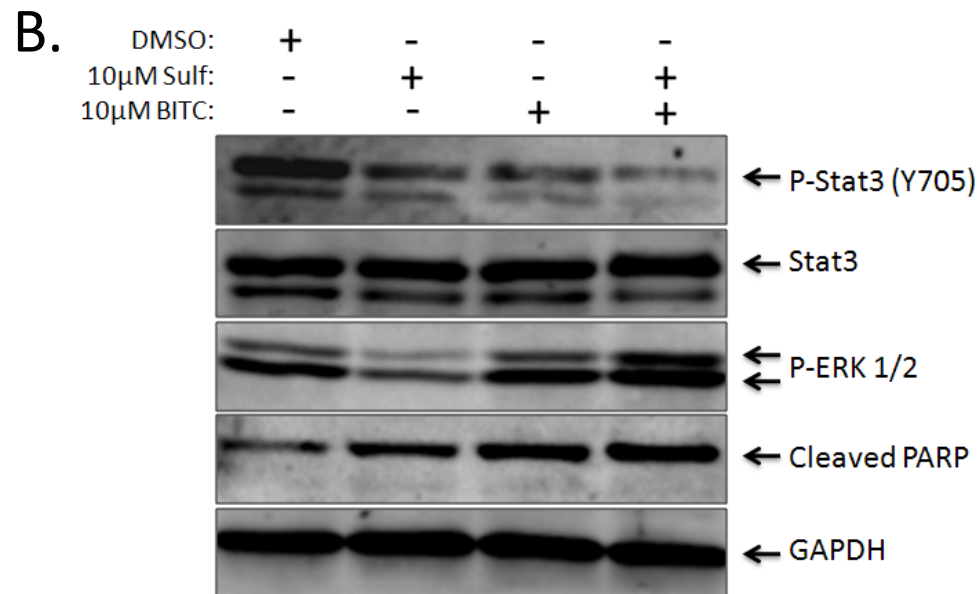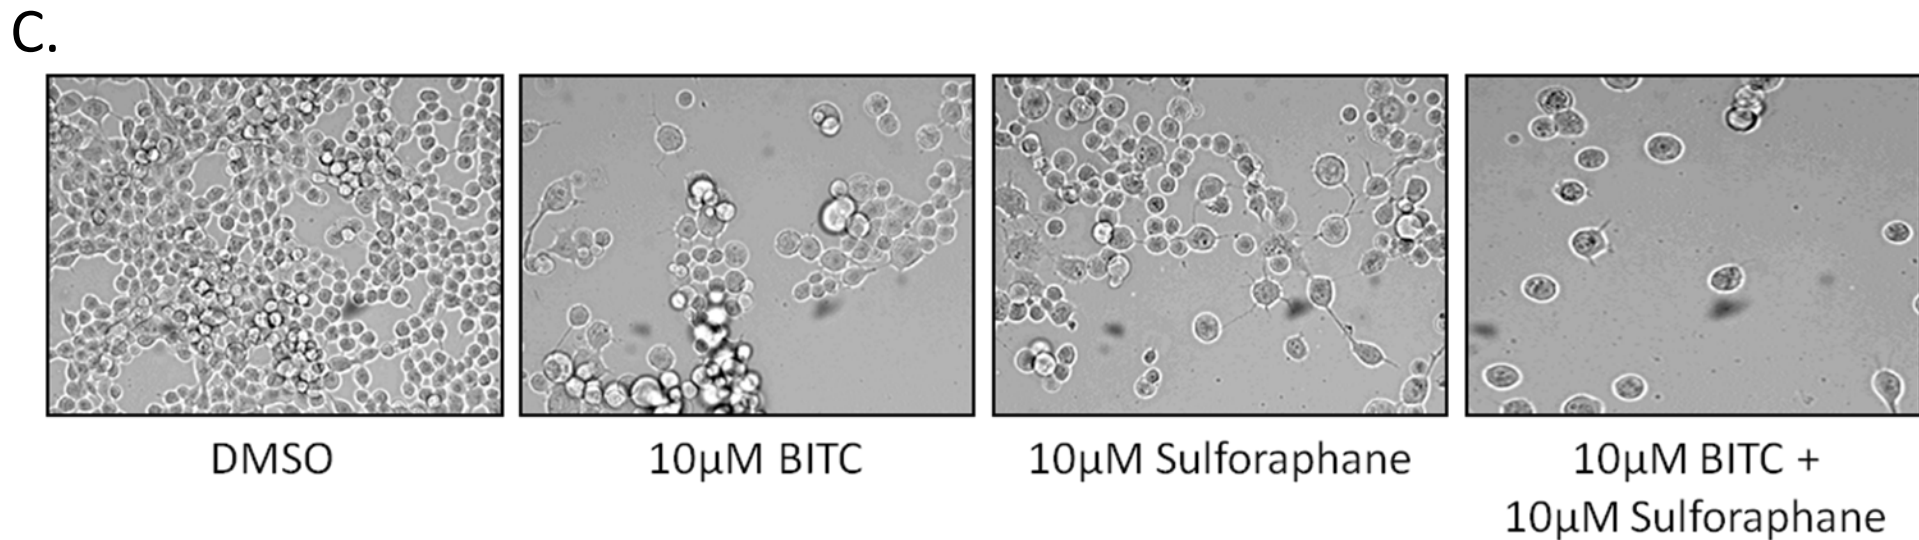

Supplement: MOESM4 [file 9541354]
